# Supplementary material
Source: Springer Nature journal article supplement (https://www.springermedizin.de/resource/supplementary/12936_2007_450_MOESM2_ESM.pdf/9547474)
Supplement: MOESM2 [file 9547474]

Step 1:  
Attending  
pre-arranged  
**Community  
meetings**  
organised by  
community  
leaders

Step 2:  
Individual  
**households**  
with eligible  
children;  
explanation  
and invitation  
to dispensary

Step 3:  
**Dispensary with parents  
bringing children**

- Group information and  
question and answer  
sessions
- Individual information  
giving and signing of  
consent forms

Step 4:  
**Individual parents**  
group information  
and question and  
answer sessions  
prior to  
administration of  
the first vaccine

Quiz administered to individual parents by another  
research group just prior to parents leaving
